# Supplementary material for: Using single-nucleus RNA-sequencing to interrogate transcriptomic profiles of archived human pancreatic islets
Source: PubMed Central journal article supplement (PMC8356387; doi:10.1186/s13073-021-00941-8), 2021-08-10
Supplement: 13073_2021_941_MOESM3_ESM.pdf [file 13073_2021_941_MOESM3_ESM.pdf]

# Basile G. Fig. S1

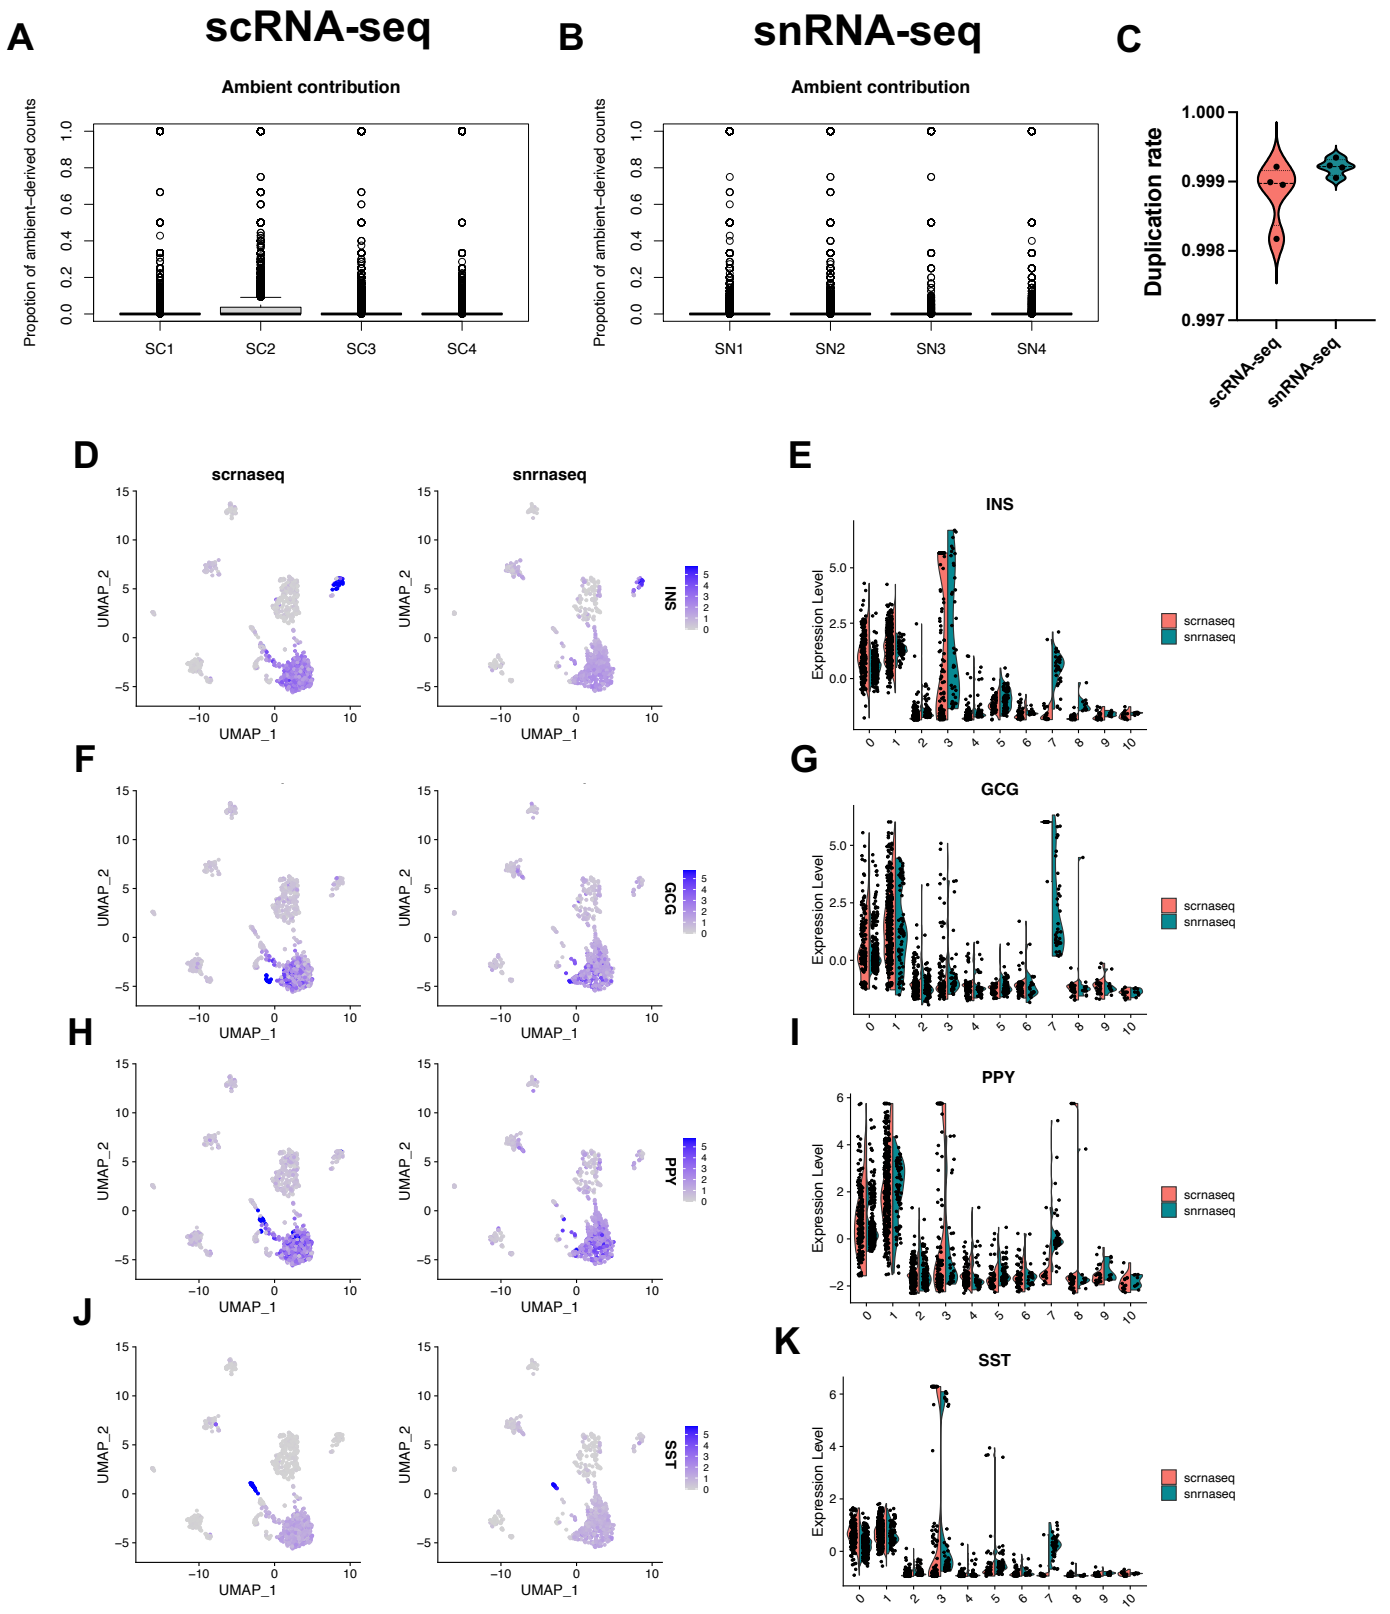

# Basile G. Fig. S2

**A**

$\alpha$ -cells

$\beta$ -cells

PP-cells

$\delta$ -cells

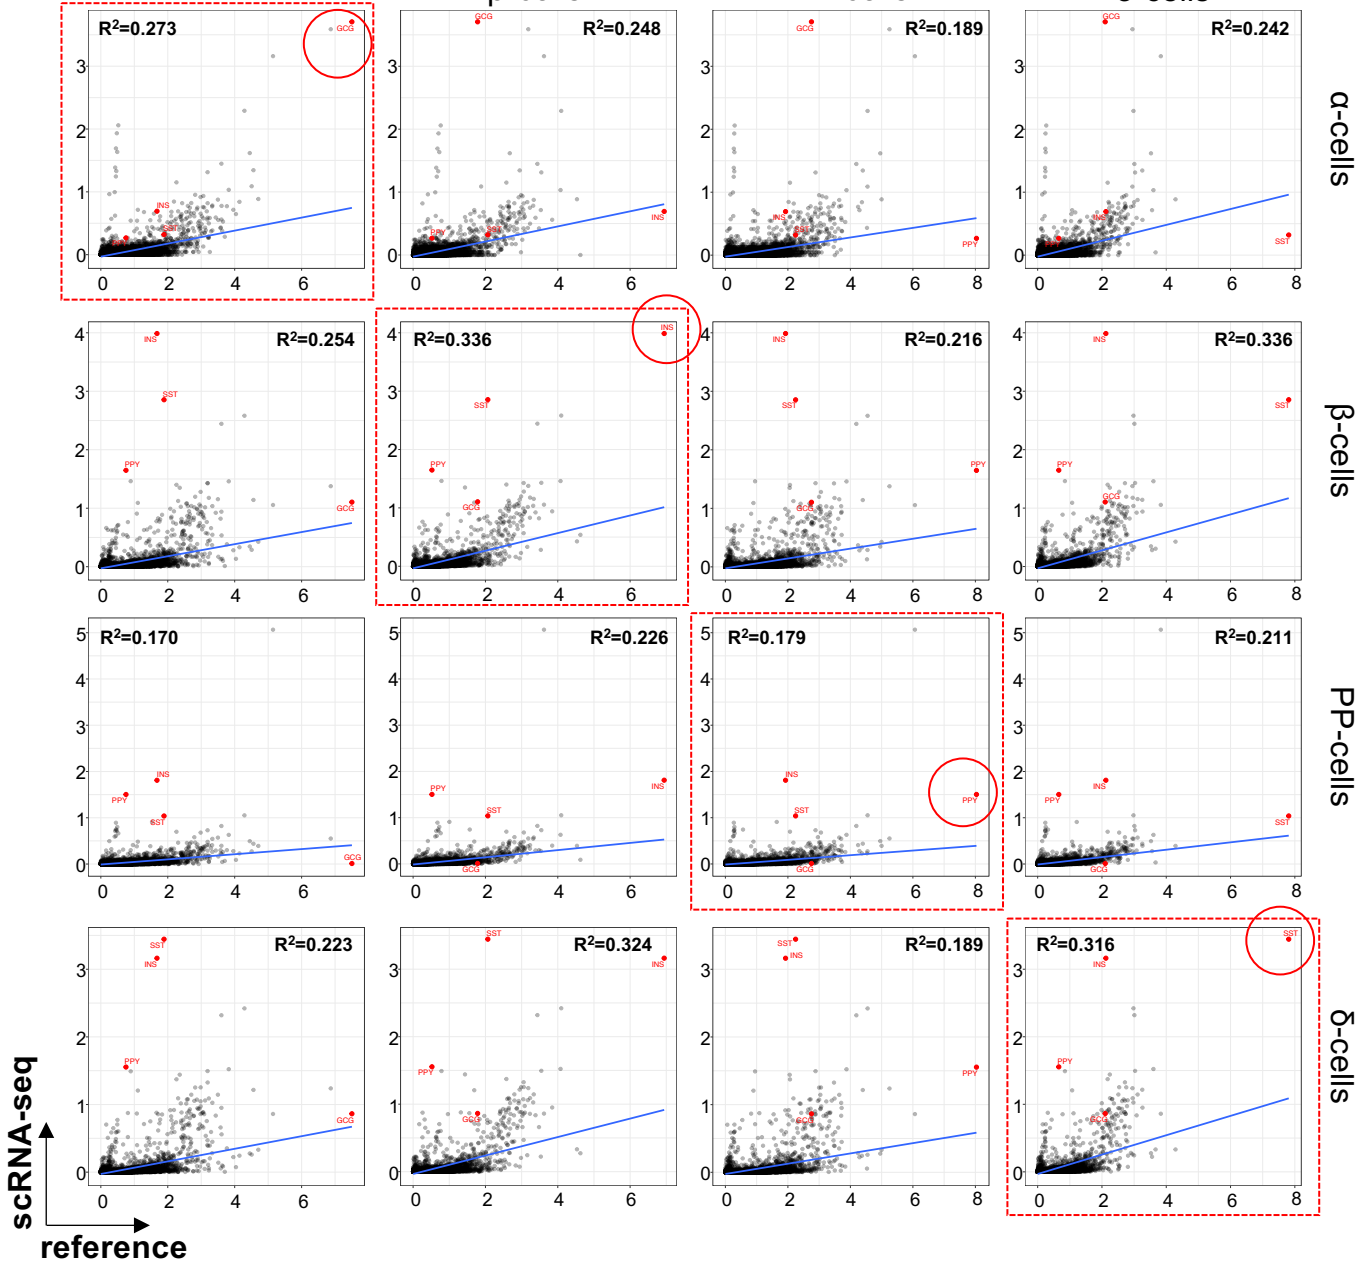

**B**

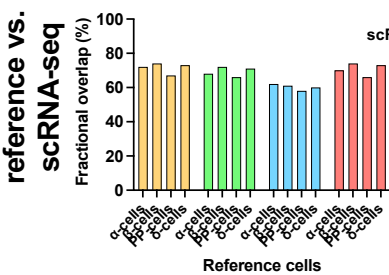

**C**

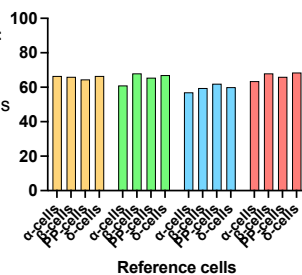

**D**

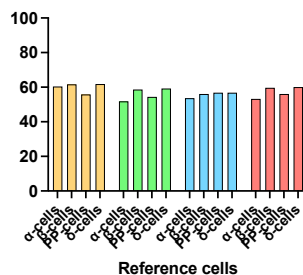

**E**

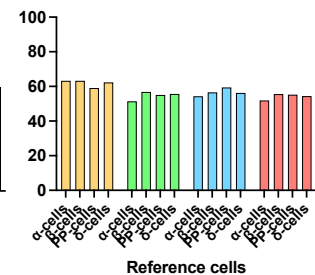

Basile G. Fig. S3

**A**

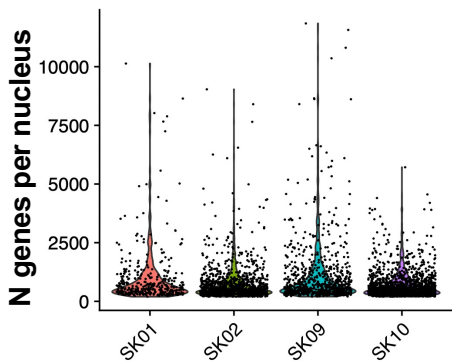

**B**

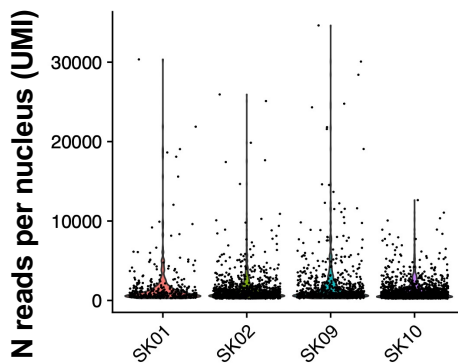

**C**

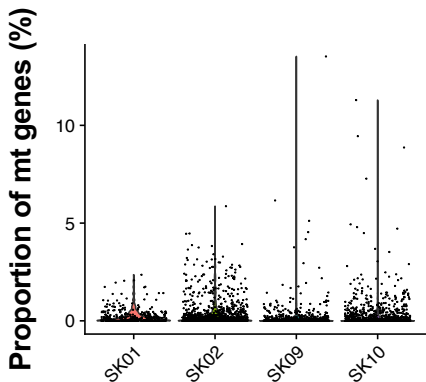

**D**

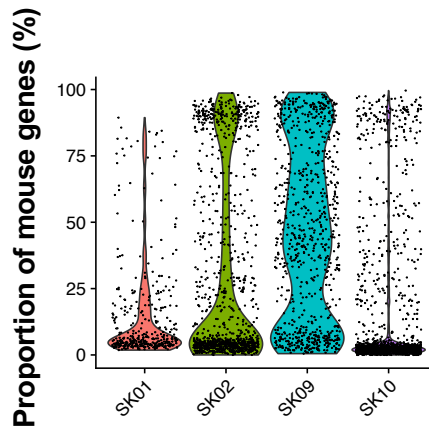

**E**

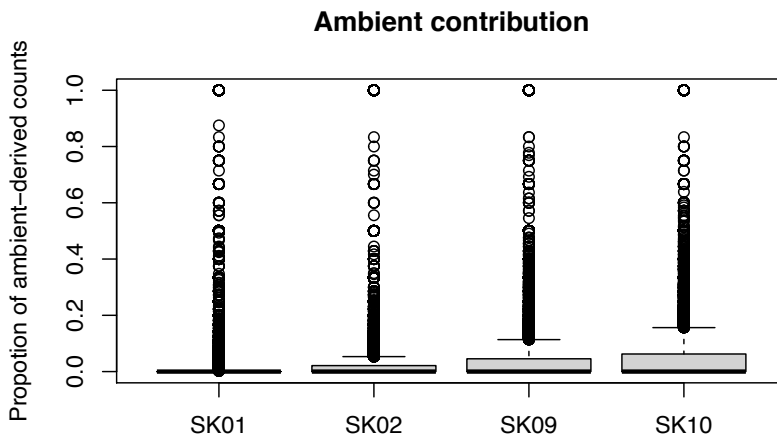

**F**

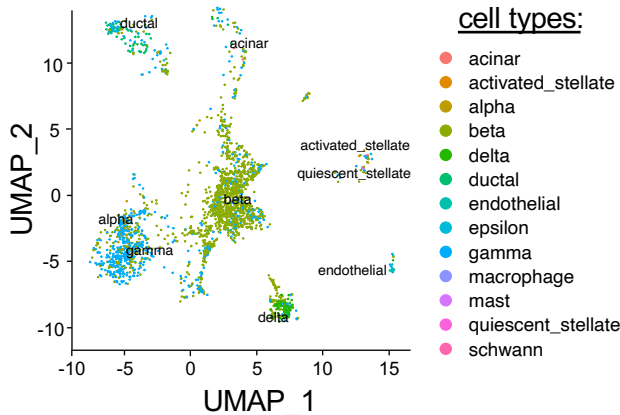

Human islet graft - SK01

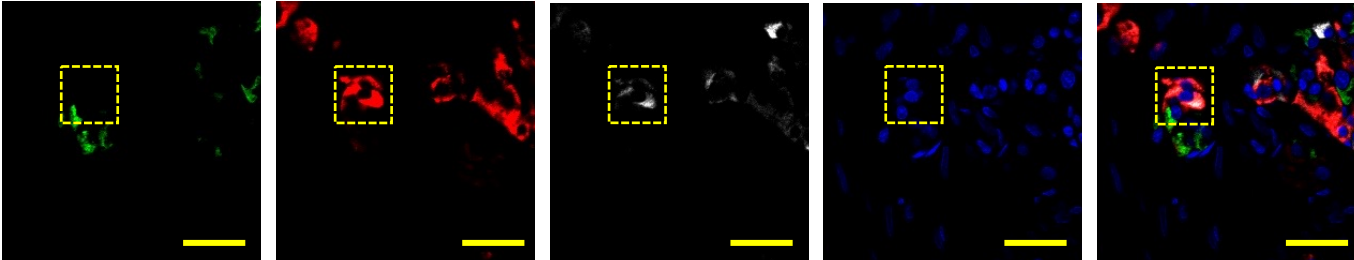

Human islet graft - SK09

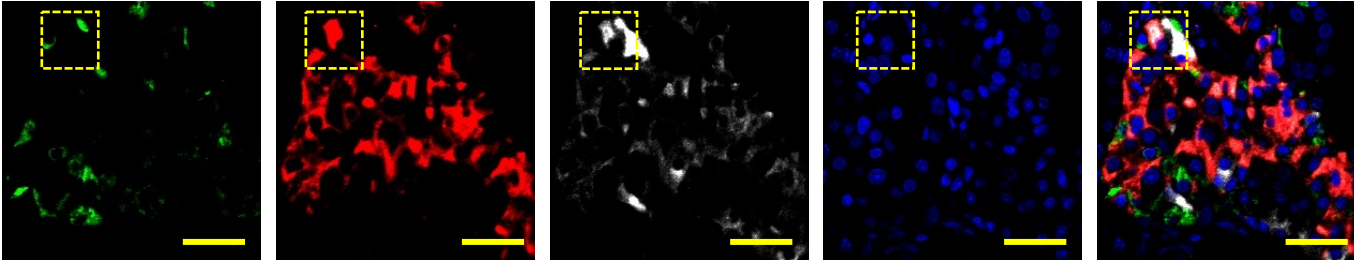

GCG INS SST DAPI
